# Supplementary material for: Rv3737 Is Required for Mycobacterium Tuberculosis Growth in Vitro and in Vivo and Correlates With Bacterial Load and Disease Severity in Human Tuberculosis
Source: Research Square preprint supplement (doi:10.21203/rs.3.rs-258096/v1), 2021-03-05
Supplement: Supplementary file 1 [file 90264d50f871d379ef7d70cd.docx]

**Table S1. Bacterial strains, plasmids and cells used in this study**

| **Strains/plasmids/cells** | **Description** | **source/reference** |
| --- | --- | --- |
| **Strains** |  |  |
| Wild-type *Mtb* H37Rv | Pathogenic; for amplifying *M. tuberculosis* Rv3737 gene | Guizhou provincial Center For Disease Control And Prevention |
| *M.smegmatis* mc2  155 | Nonpathogenic; for amplifying *M. tuberculosis* Rv3737 gene and achieving homologous recombination at *rmlA* locus | Wuhan Institute of Virology, CAS |
| *E. coli* DH5α | For constructing plasmids | Tsingke biological tachnology |
| *E. coli* HB101 | For constructing plasmids | Tsingke biological tachnology |
| H37RvΔRv3737 | *M. tuberculosis* Rv3737 knockout strain | This work |
| *Clinical Mtb* isolates | Collected from a cohort of participants with pulmonary TB | Affiliated Hospital of Zunyi Medical University |
| **Plasmids** |  |  |
| p0004s | For constructing plasmids | Wuhan Institute of Virology, CAS |
| phAE159 | For constructing plasmids | Wuhan Institute of Virology, CAS |
| p0004s-LR | For constructing plasmids | This work |
| phAE159-p0004s-LR | For constructing plasmids | This work |
| **Cells** |  |  |
| RAW264.7 | Mouse mononuclear macrophage leukemia cells | Affiliated Hospital of Zunyi Medical University |
